# Supplementary material for: Pyrene-tetrathiafulvalene supramolecular assembly with different types of carbon nanotubes
Source: Royal Society of Chemistry journal article supplement (doi:10.1039/b716892f), 2008-01-01
Supplement: b716892f.pdf [file b716892f.pdf]

## Supporting Information

### Pyrene-Tetrathiafulvalene Supramolecular Assembly with Different Types of Carbon Nanotubes

**Christian Ehli,<sup>a</sup> Dirk M. Guldi,<sup>\*a</sup> M. Ángeles Herranz,<sup>b</sup> Nazario Martín,<sup>\*b</sup> Stéphane Campidelli,<sup>cd</sup> and Maurizio Prato<sup>\*c</sup>**

<sup>a</sup> *Friedrich-Alexander-Universität Erlangen-Nürnberg Department of Chemistry and Pharmacy & Interdisciplinary Center for Molecular Materials (ICMM) Egerlandstrasse 3, 91058 Erlangen, Germany. Fax: +49- 9131-852-8307; E-mail: [dirk.guldi@chemie.uni-erlangen.de](mailto:dirk.guldi@chemie.uni-erlangen.de)*

<sup>b</sup> *Departamento de Química Orgánica I, Facultad de Química, Universidad Complutense, E-28040 Madrid, Spain. Fax: +34- 91-394-4103; E-mail: [nazmar@quim.ucm.es](mailto:nazmar@quim.ucm.es)*

<sup>c</sup> *Dipartimento di Scienze Farmaceutiche, Università di Trieste, Piazzale Europa, 1, 34127 Trieste, Italy. Fax: +39- 040-52-572; E-mail: [prato@units.it](mailto:prato@units.it)*

<sup>d</sup> *Laboratoire d'Electronique Moléculaire, Service de Physique de l'Etat Condensé (CNRS URA 2464), CEA Saclay, F-91191 Gif sur Yvette Cedex, France.*

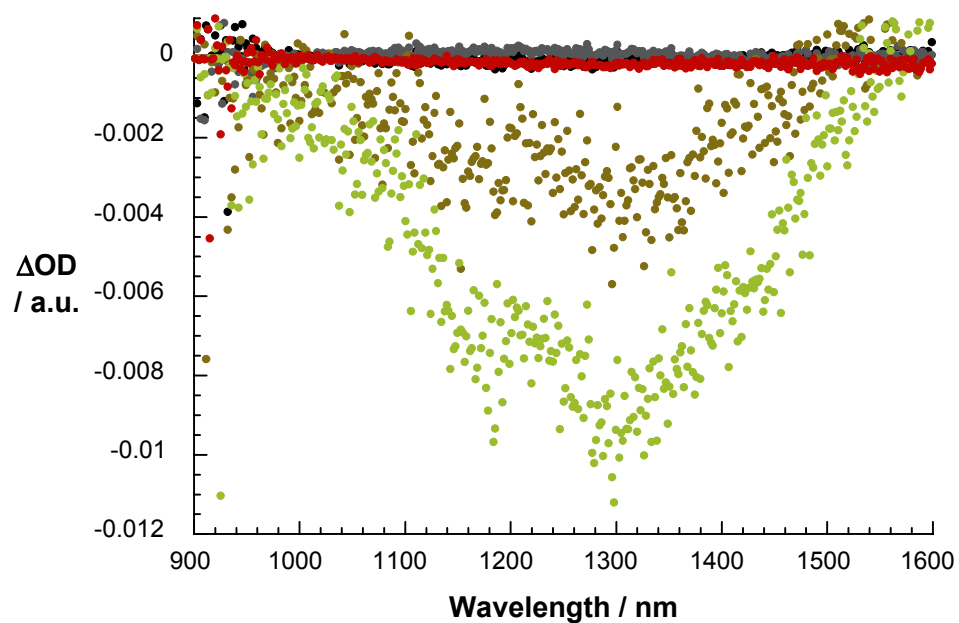

**Figure S1:** Upper part – differential absorption spectra (near-infrared) obtained upon femtosecond flash photolysis (387 nm) of SWNT in THF with several time delays between 0 and 1500 ps (i.e., black – 0.02 ps; grey – 0.28 ps; brown – 0.92 ps; green – 1.22 ps; red – 1500 ps) at room temperature.

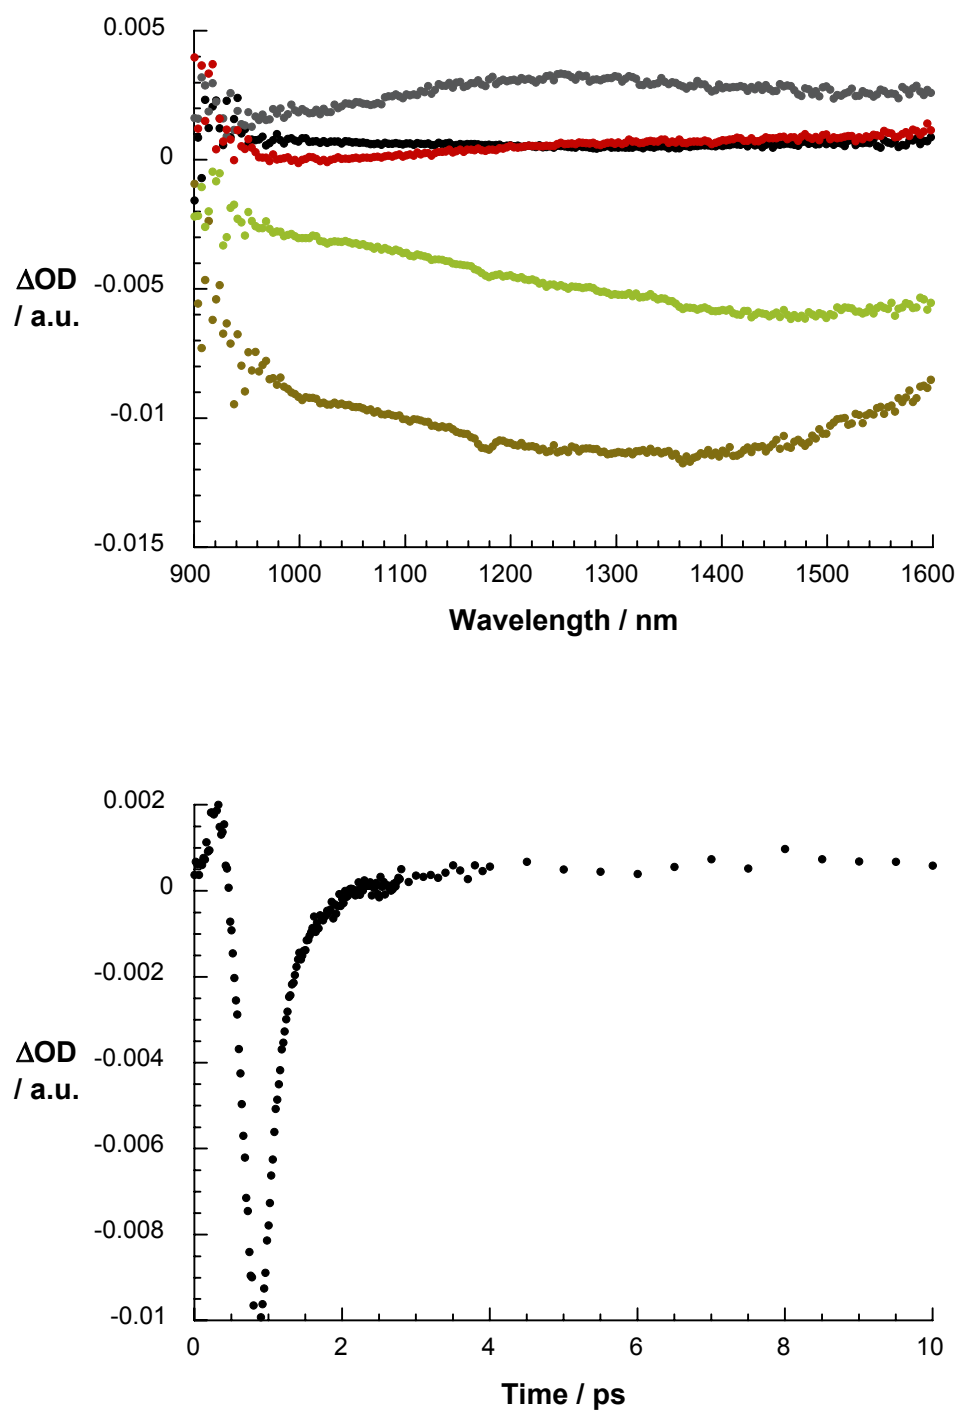

**Figure S2:** Upper part – differential absorption spectra (near-infrared) obtained upon femtosecond flash photolysis (387 nm) of MWNT in THF with several time delays between 0 and 2.5 ps (i.e., black – 0.02 ps; grey – 0.28 ps; brown – 0.92 ps; green – 1.22 ps; red – 2.5 ps) at room temperature. Lower part – time-absorption profiles of the spectra shown above at 1060 nm.

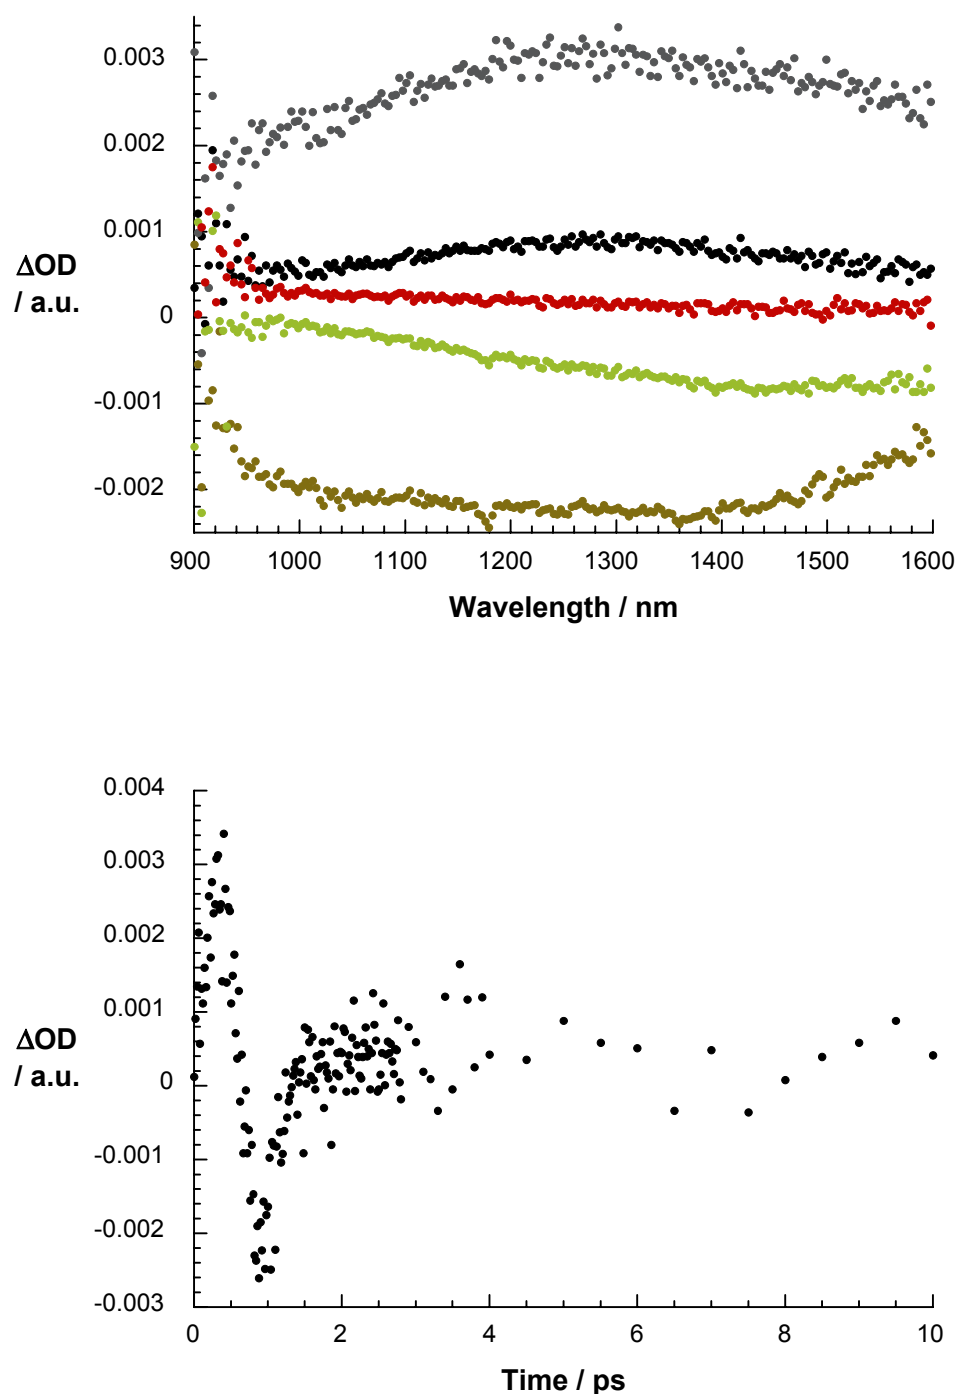

**Figure S3:** Upper part – differential absorption spectra (near-infrared) obtained upon femtosecond flash photolysis (387 nm) of TMWNT in THF with several time delays between 0 and 2.5 ps (i.e., black – 0.02 ps; grey – 0.28 ps; brown – 0.92 ps; green – 1.22 ps; red – 2.5 ps) at room temperature. Lower part – time-absorption profiles of the spectra shown above at 1060 nm.
